# Supplementary material for: Genome-Wide Analysis of the NAC Gene Family in Physic Nut (Jatropha curcas L.)
Source: PubMed Central journal article supplement (PMC4488383; doi:10.1371/journal.pone.0131890), 2015-06-30

# S3 Fig. Maximum likelihood phylogenetic trees of each main cluster of NAC proteins.

## Panel A. CL00003: OGs 1a-h

Groups 1a-h

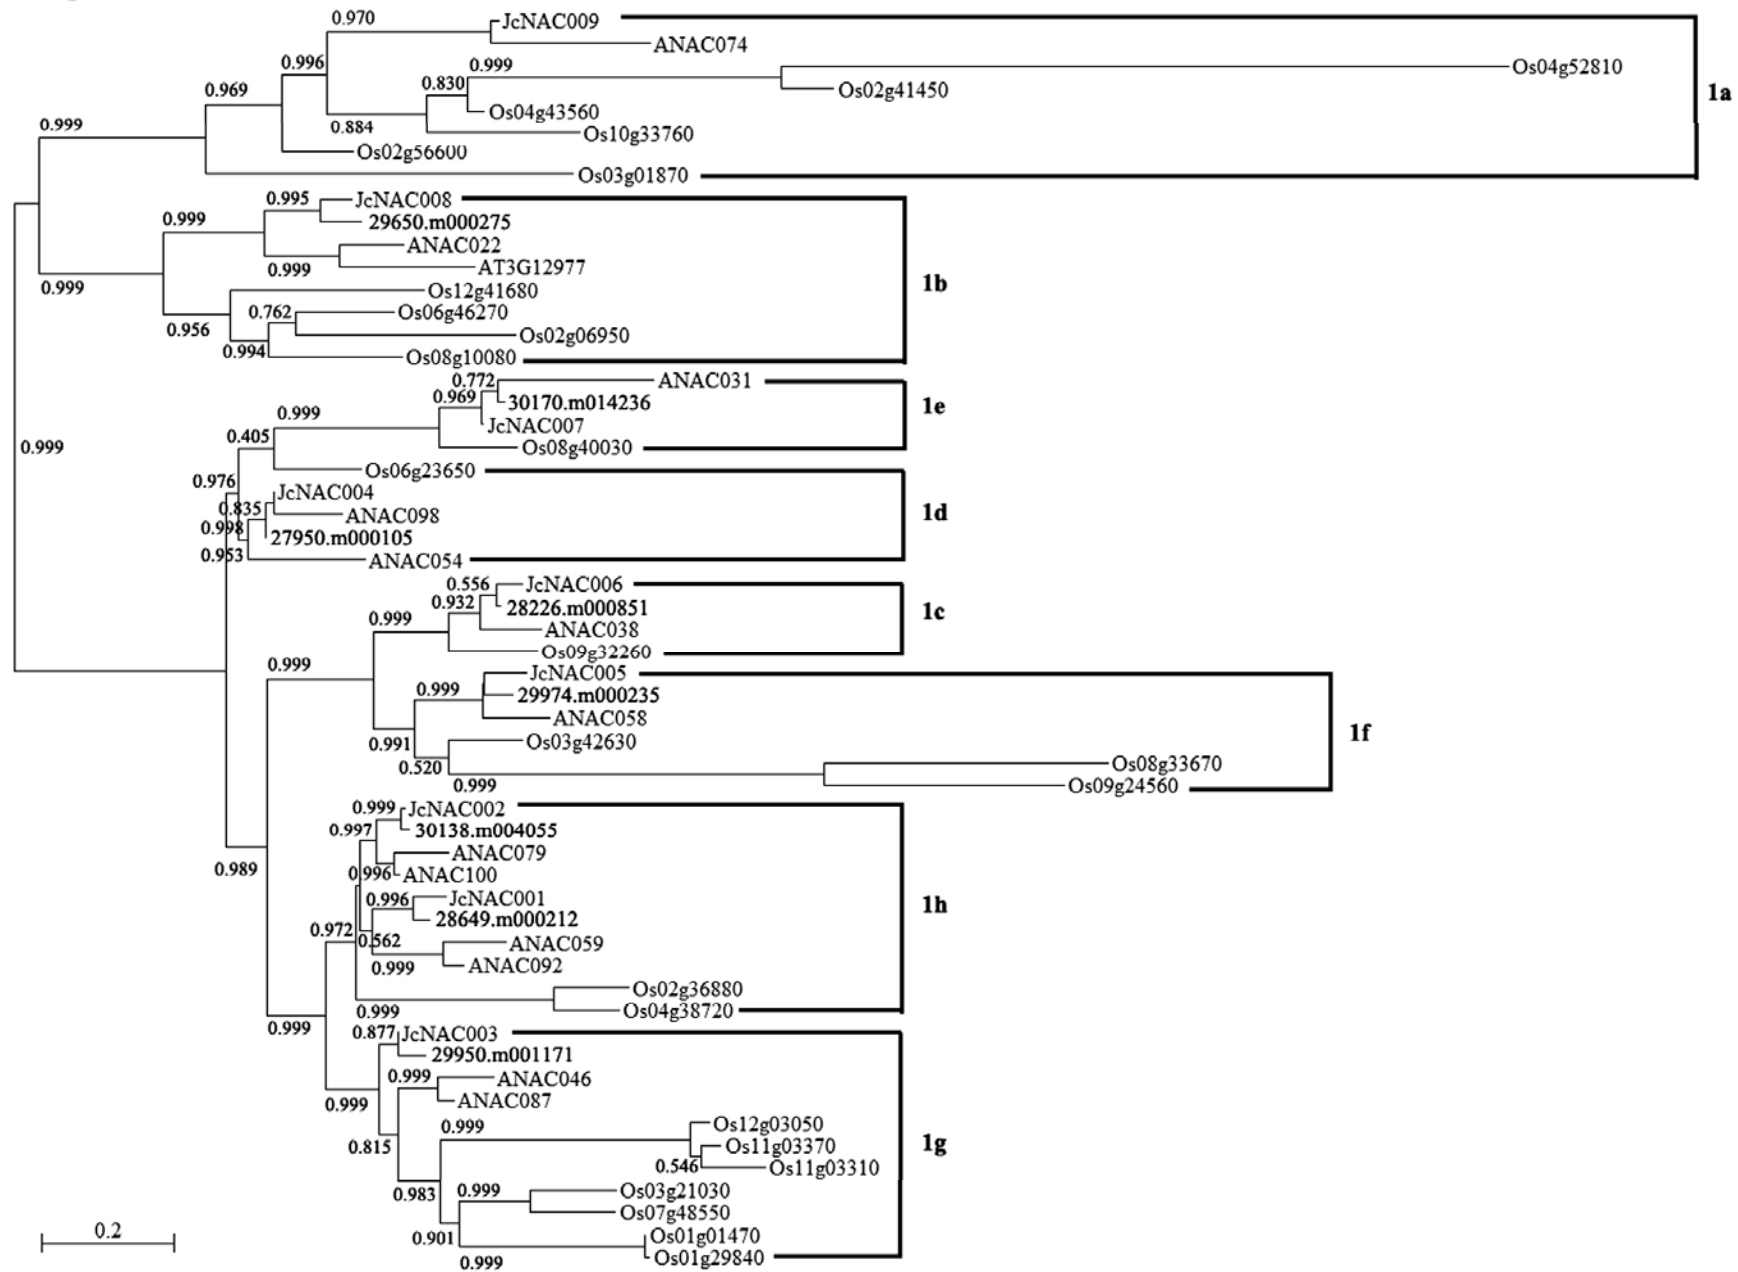

# Panel B. CL000006: OGs 2a-f

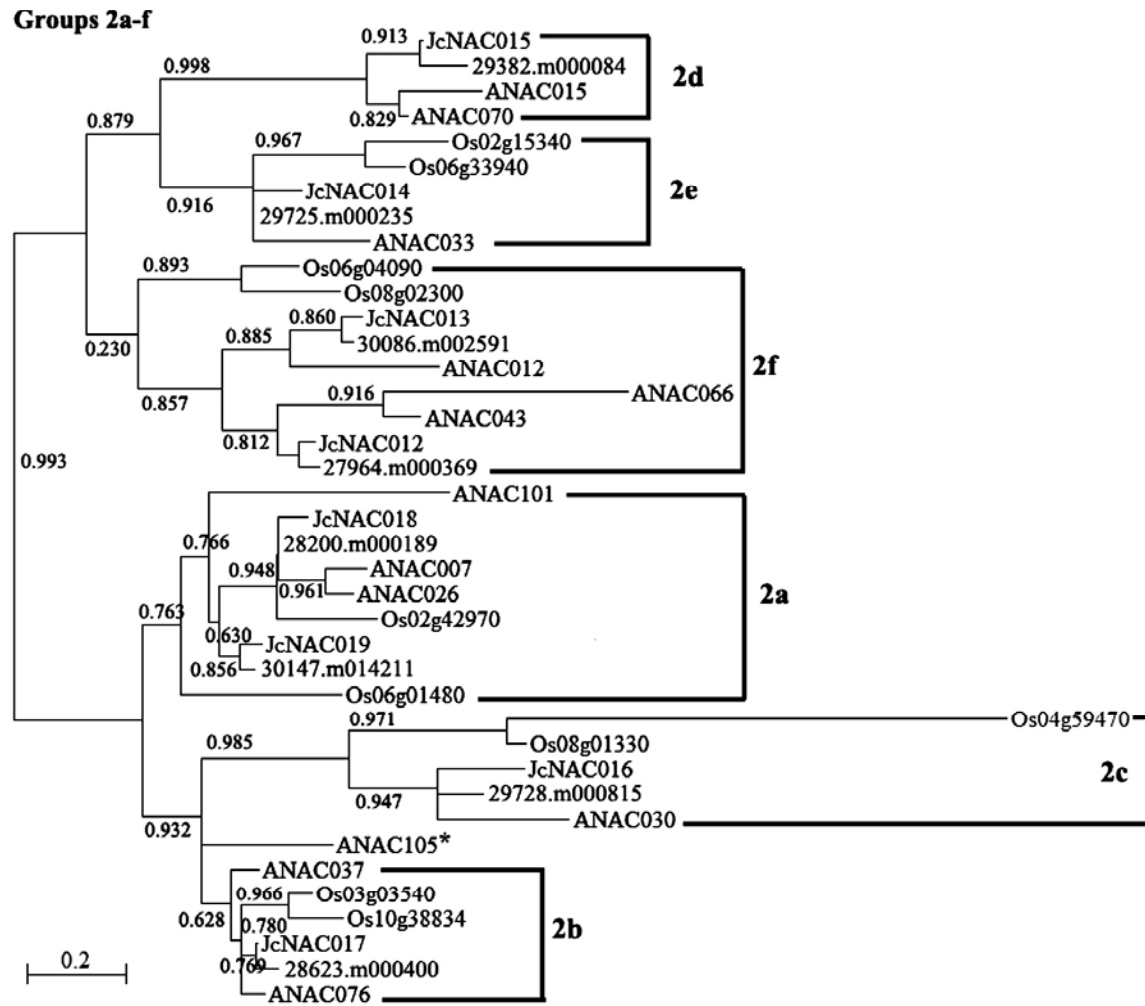

# Panel C. CL000002: OGs 3a-e, 5a, 7e

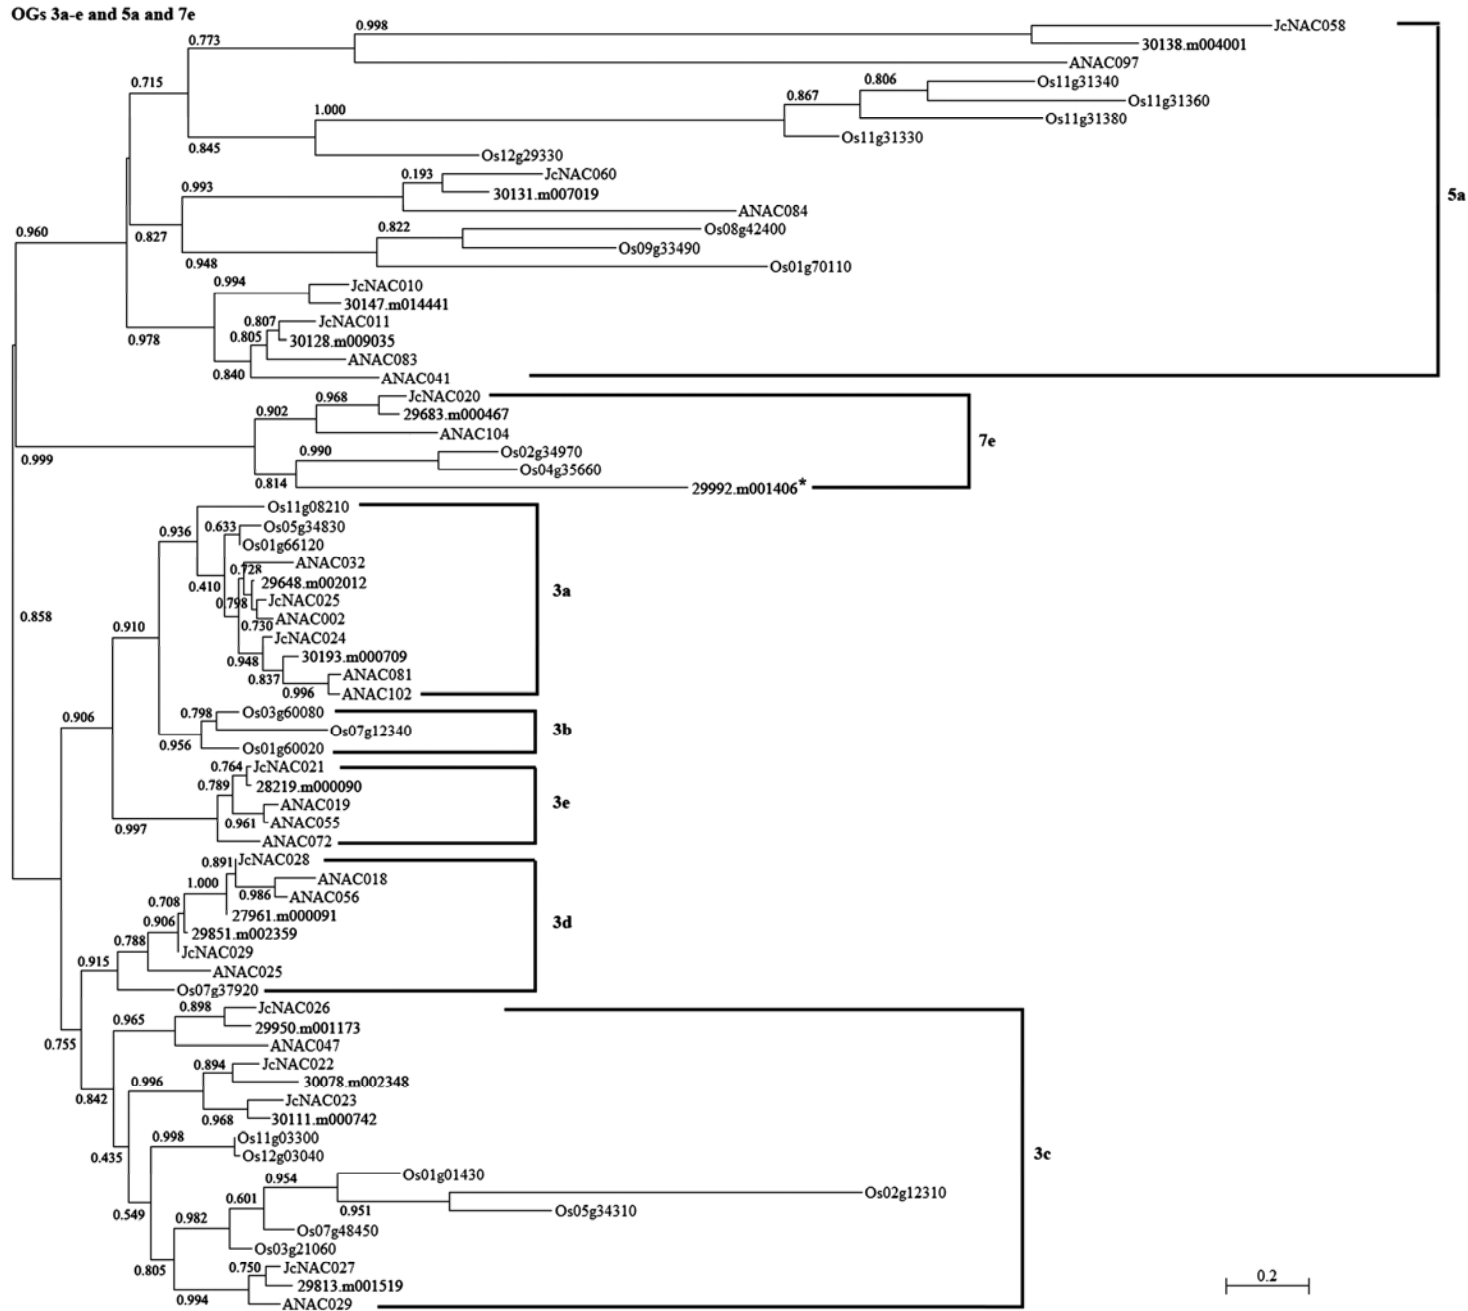

# Panel D. CL000004: OGS 4a-g, 5b-c

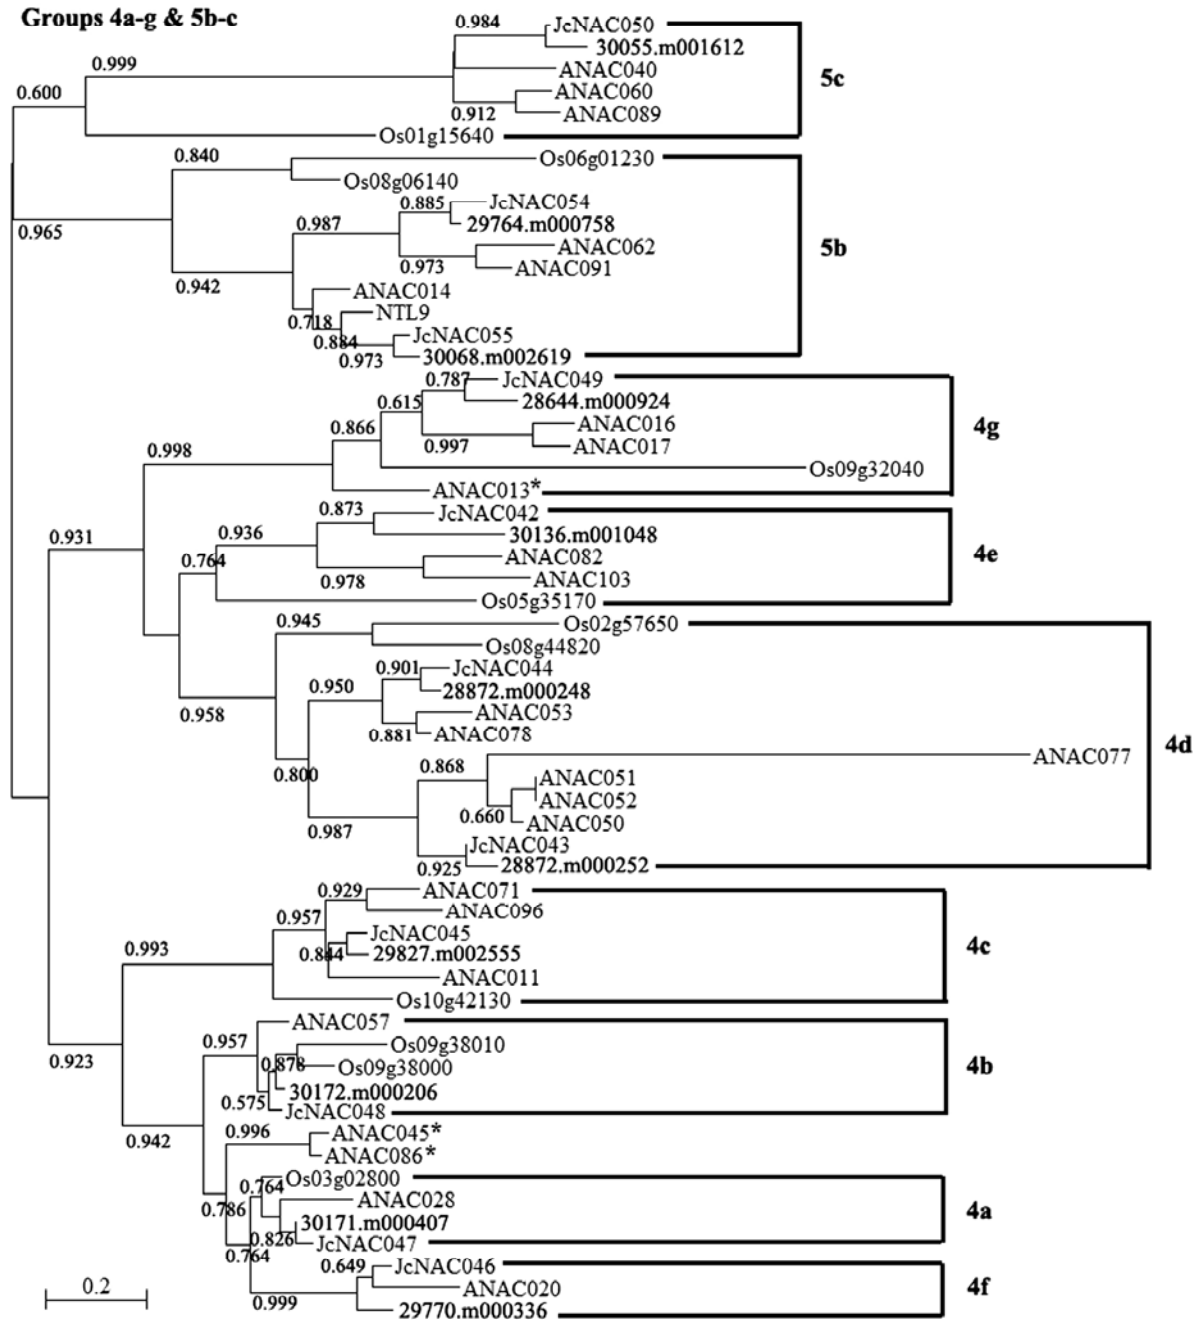

# Panel E. CL000005: OGs 6a-c, 8a-b

Groups 6a-c & 8a-b

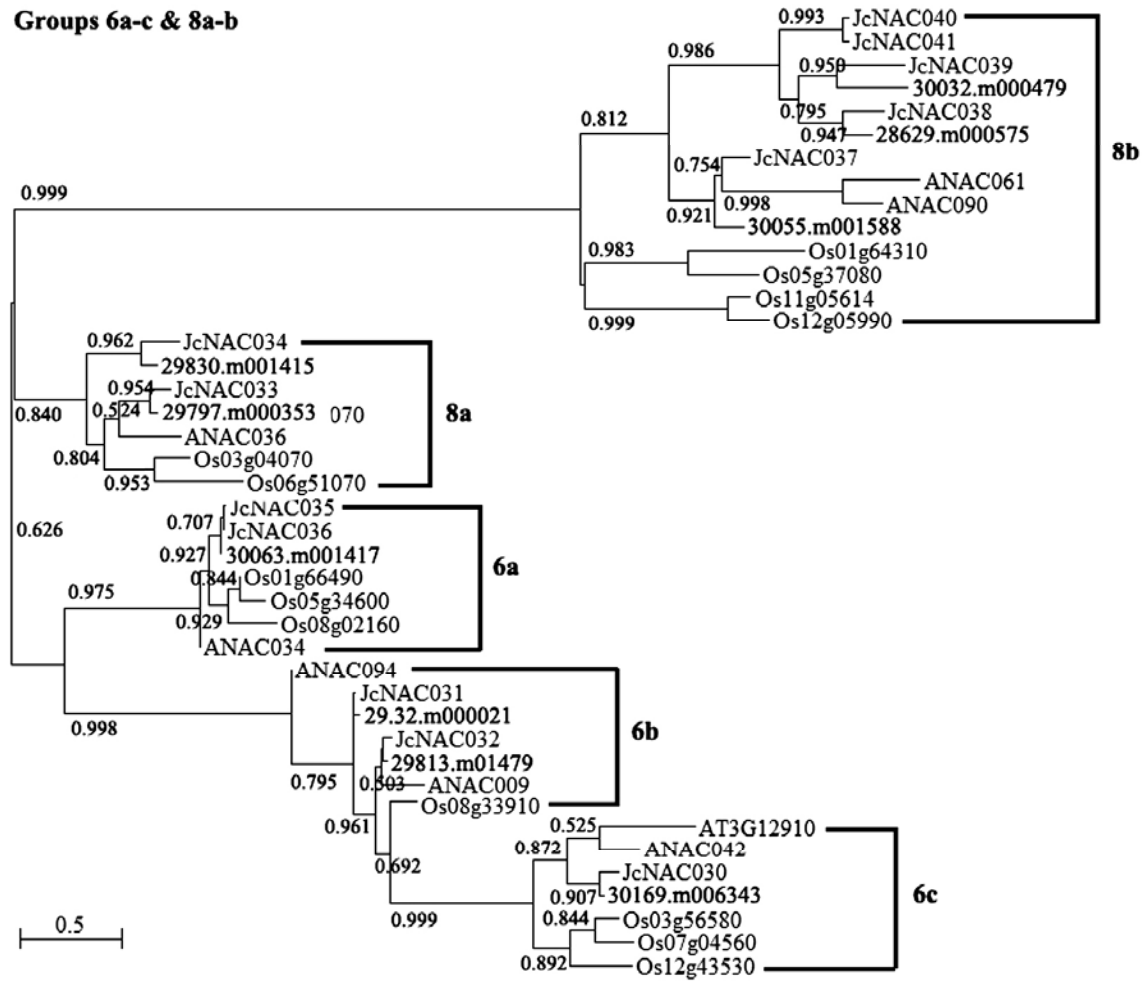

# Panel F. CL000007: OGs 7a-d

Groups 7a-d

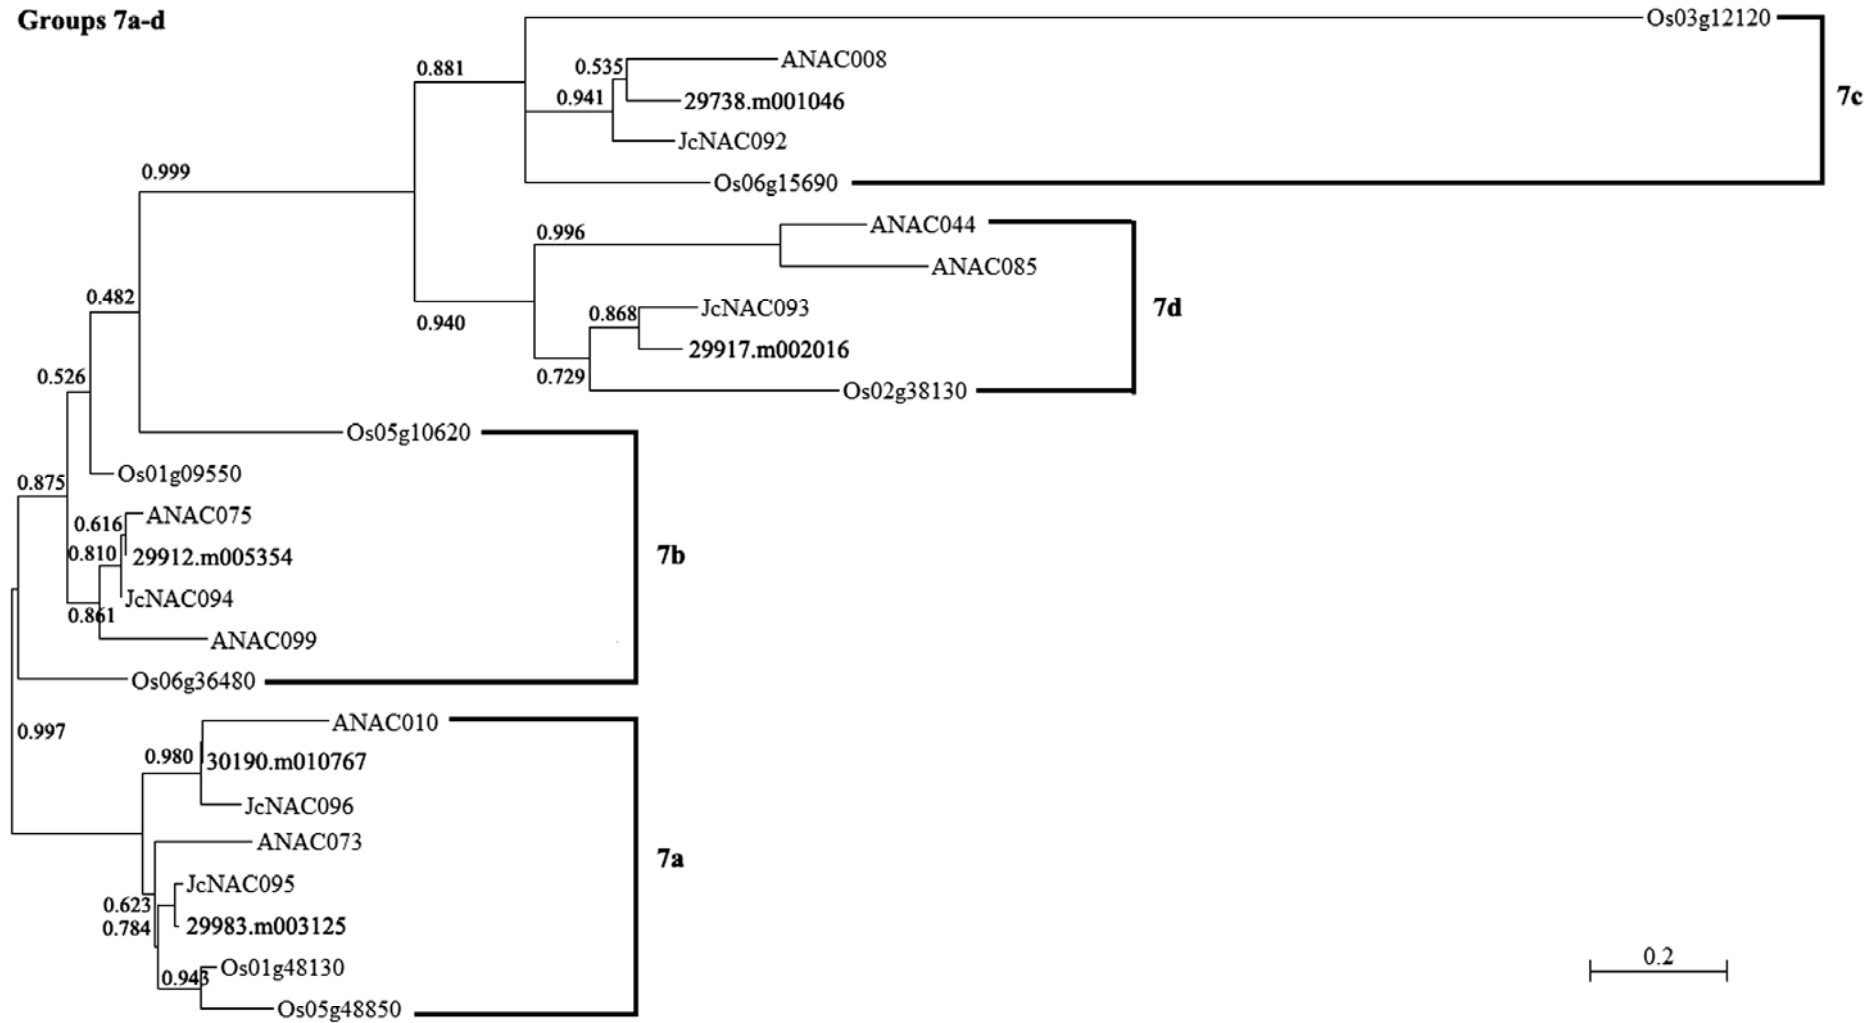

# Panel G. Phylogenetic tree of unclassified NAC proteins from physic nut, Arabidopsis and rice

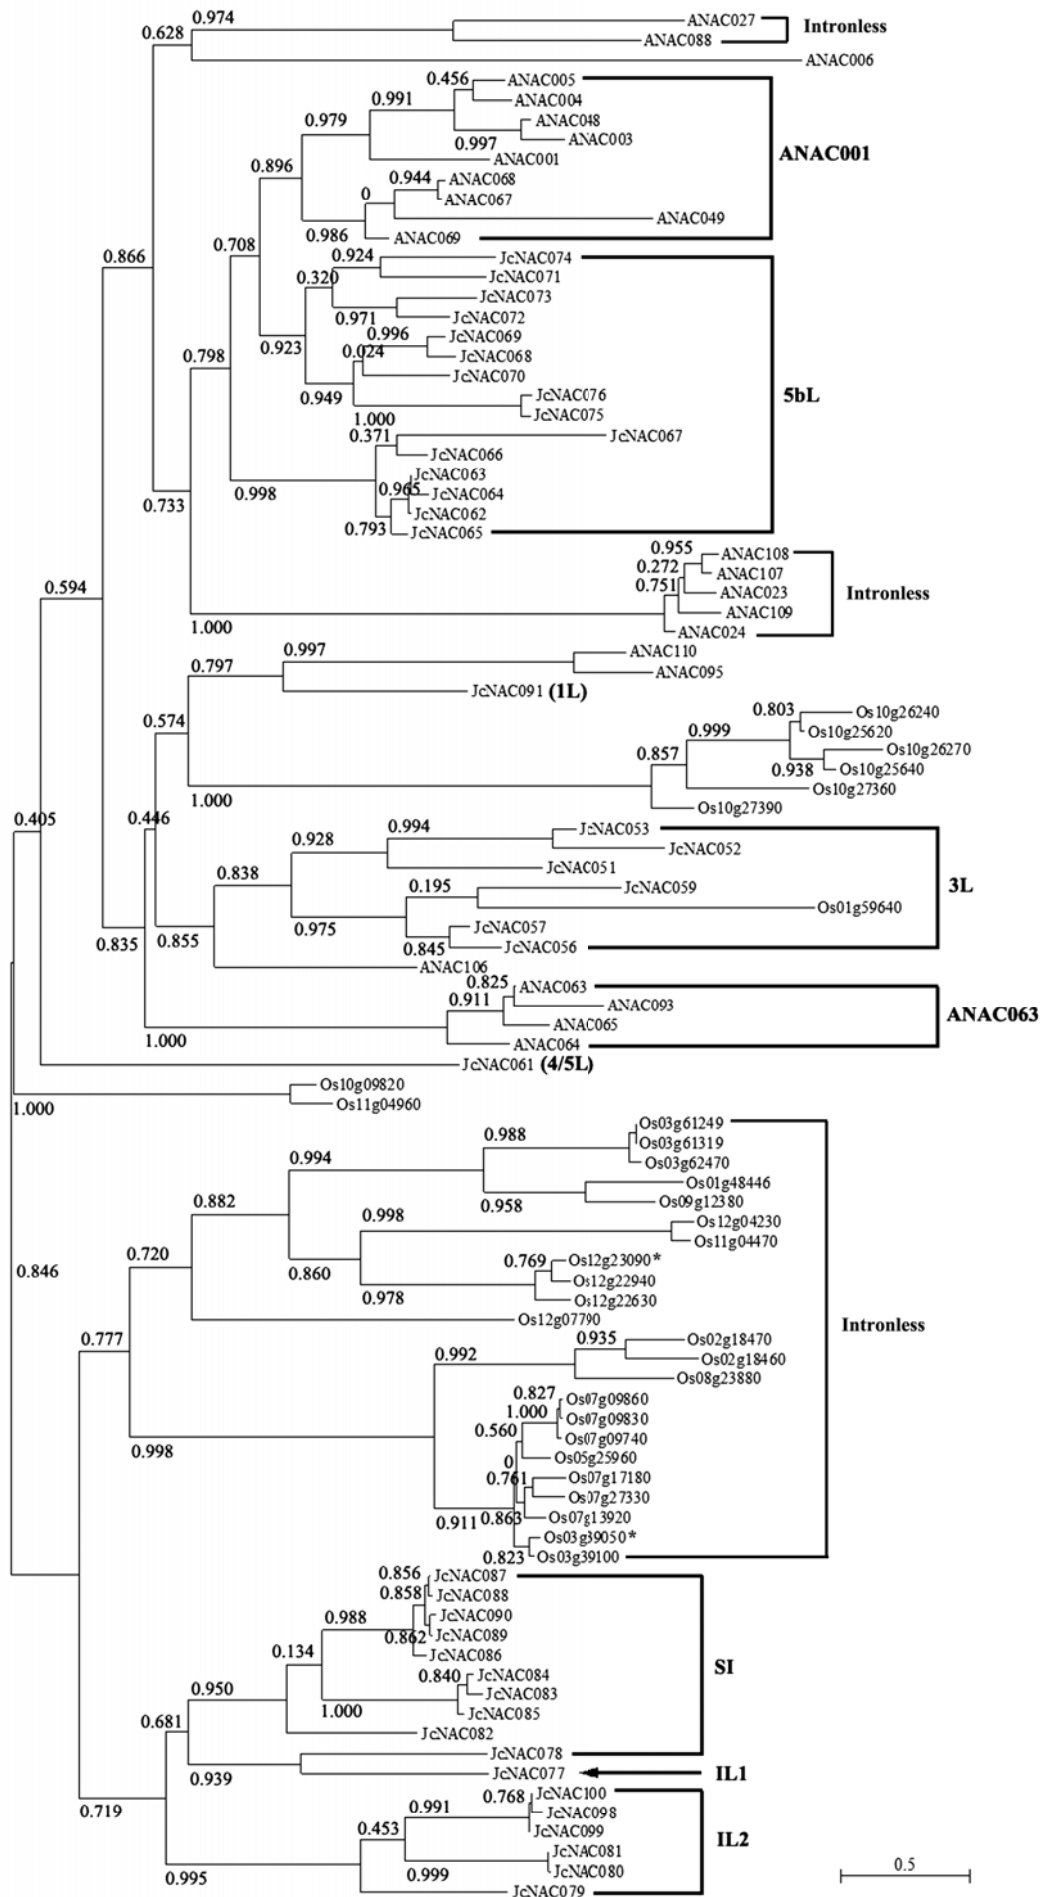

Supplement: pone.0131890.s003.pdf [file pone.0131890.s003.pdf]
